# Supplementary material for: Early Clinical Experience with Trifluridine/Tipiracil for Refractory Metastatic Colorectal Cancer: The ROS Study
Source: MDPI journal article supplement (doi:10.3390/cancers13184514), 2021-09-08
Supplement: s1 [file s1]

**Supplementary Table S2.** Grade  $\geq 3$  treatment-related adverse events ( $n=379$ )

| Adverse event                                                | <i>n</i> (%) |
|--------------------------------------------------------------|--------------|
| Any grade $\geq 3$ treatment-related adverse event           | 141 (37.2)   |
| Grade $\geq 3$ treatment-related adverse events <sup>a</sup> |              |
| Neutropaenia (afebrile)                                      | 88 (23.2)    |
| Anaemia                                                      | 46 (12.1)    |
| Thrombocytopaenia                                            | 20 (5.3)     |
| Diarrhoea                                                    | 15 (4.0)     |
| Asthenia                                                     | 13 (3.4)     |
| Febrile neutropaenia                                         | 11 (2.9)     |
| Nausea                                                       | 8 (2.1)      |
| Vomiting                                                     | 5 (1.3)      |
| Decreased appetite                                           | 3 (0.8)      |
| Renal impairment                                             | 2 (0.5)      |

<sup>a</sup>Grade  $\geq 3$  treatment-related adverse events reported in  $>1$  patient are presented.
