# Supplementary material for: Early Clinical Experience with Trifluridine/Tipiracil for Refractory Metastatic Colorectal Cancer: The ROS Study
Source: MDPI journal article supplement (doi:10.3390/cancers13184514), 2021-09-08
Supplement: s1 [file s1]

**Supplementary Table S1.** Trifluridine/tipiracil exposure and management (*n*=379)

| Treatment characteristics                                                                | Value                      |
|------------------------------------------------------------------------------------------|----------------------------|
| Planned dose at first cycle (mg/m <sup>2</sup> , twice a day), median (IQR) <sup>a</sup> | 35.0 (35.0-35.0)           |
| Treatment modification, <i>n</i> (%)                                                     |                            |
| Dose reduction                                                                           | 116 (30.6)                 |
| Due to toxicity <sup>b</sup>                                                             | 108 (28.5)                 |
| Due to general state impairment                                                          | 6 (1.5)                    |
| Due to other reasons                                                                     | 2 (0.5)                    |
| Dose delay                                                                               | 191 (50.4)                 |
| Due to toxicity <sup>c</sup>                                                             | 167 (44.1)                 |
| Due to general state impairment                                                          | 11 (2.9)                   |
| Due to other reasons                                                                     | 32 (8.4)                   |
| Reasons for end of treatment, <i>n</i> (%)                                               |                            |
| Disease progression                                                                      | 300 (79.2)                 |
| General state impairment                                                                 | 48 (12.7)                  |
| Toxicity <sup>d</sup>                                                                    | 17 (4.5)                   |
| Patient decision                                                                         | 7 (1.8)                    |
| Other reasons                                                                            | 7 (1.8)                    |
| Total number of administered cycles, median (IQR)                                        | 3.0 (2.0-4.0) <sup>e</sup> |

*IQR* interquartile range.

<sup>a</sup>The planned dose at the first cycle was <35 mg/m<sup>2</sup> in 8 patients: 25 mg/m<sup>2</sup> *n*=1, and 30 mg/m<sup>2</sup> *n*=7.

<sup>b</sup>These 108 patients had 137 dose reductions due to the following toxicities: neutropaenia *n*=94, asthenia *n*=18, diarrhoea *n*=17, anaemia *n*=16, anaemia/thrombopaenia *n*=9, thrombopaenia *n*=5, bilirubin increase *n*=3, nausea/vomiting *n*=3, leucopaenia *n*=2, vomiting *n*=2, lymphocytopenia *n*=1, mucositis *n*=1, nausea *n*=1, pancytopenia *n*=1, and sickness/vomiting *n*=1 (multiple response variable, there may be more than one toxicity for each reduced dose).

<sup>c</sup>These 167 patients had 247 dose delays due to the following toxicities: neutropaenia *n*=197, anaemia *n*=25, diarrhoea *n*=13, asthenia *n*=12, thrombopaenia *n*=6, bilirubin increase *n*=5, leucopaenia *n*=2, nausea *n*=2, alkaline phosphatase *n*=1, alopecia *n*=1, anaemia/thrombopaenia *n*=1, bacterial infection *n*=1, fever *n*=1, liver

toxicity  $n=1$ , and vomiting  $n=1$  (multiple response variable, there may be more than one toxicity for each delayed dose).

<sup>d</sup>These 17 patients reported end of treatment due to the following toxicities: neutropaenia  $n=6$ , anaemia  $n=3$ , diarrhoea  $n=2$ , asthenia  $n=2$ , anorexia  $n=1$ , atrial fibrillation  $n=1$ , cardiac toxicity  $n=1$ , impaired kidney function  $n=1$ , liver toxicity  $n=1$ , lumbalgia  $n=1$ , nausea  $n=1$ , pancytopenia  $n=1$ , urinary tract infections favoured by neutropaenia  $n=1$  (multiple response variable, there may be more than one toxicity for each ended treatment).

<sup>e</sup>Missing data  $n=1$ .
